# Supplementary material for: Anti-fat effect and mechanism of polysaccharide-enriched extract from Cyclocarya paliurus (Batal.) Iljinskaja in Caenorhabditis elegans
Source: Royal Society of Chemistry journal article supplement (doi:10.1039/c9fo03058a), 2020-01-01
Supplement: c9fo03058a1.pdf [file c9fo03058a1.pdf]

1 **Supplementary Information**  
2 **Anti-fat effect and mechanism of polysaccharides-enriched**  
3 **extract from *Cyclocarya paliurus* (Batal.) Iljinskaja**  
4 **in *Caenorhabditis elegans***

5 **1 Primer sequences for qRT-PCR analysis**

6 **Table S1 Primer sequences for qRT-PCR analysis**

| Gene          | Primer                                                  |
|---------------|---------------------------------------------------------|
| <i>vit-2</i>  | CACTTCCTTGCTCGTCTTGTC (F)<br>AGTGGGAGAATGTCCTCGTTT (R)  |
| <i>mdt-15</i> | AACATCAGCTCAGGCAAGAAA (F)<br>TCTGTCCACCTGGACGAATAC (R)  |
| <i>sbp-1</i>  | CTACTCGCACCATTCCTTCTCG (F)<br>CCAAATCTCAACTGCTTCTGC (R) |
| <i>nhr-49</i> | CTCCATCGAAAGATCCATGA (F)<br>GGATTCTCTGCTCTCCGAGTT (R)   |
| <i>fat-5</i>  | GGGCTACAGTTGGATGGGTAT (F)<br>ATCTCTGGCCCAGTCGATAAT (R)  |
| <i>fat-6</i>  | CTTGTGCTGCTTCATTCTCC (F)<br>GAAGTTGTGACCTCCCTCTCC (R)   |
| <i>fat-7</i>  | ACCCGTGGATTCTTCTTCACT (F)<br>TAACGGAATGTTCCAGCTACG (R)  |
| <i>acs-2</i>  | GGCTGAACAACAACGCATATT (F)<br>GACTTTGATGGGAAGACCACA (R)  |
| <i>aak-2</i>  | CATATCATCCGCTCTACCAA (F)<br>GTCCGCAATCTTCACATTGTT (R)   |
| <i>act-1</i>  | TCCAAGAGAGGTATCCTTAC (F)<br>CGTTAGCCTTTGGATTGAG (R)     |

7
